# Supplementary material for: Genomic Variations in Susceptibility to Intracranial Aneurysm in the Korean Population
Source: MDPI journal article supplement (doi:10.3390/jcm8020275), 2019-02-25
Supplement: s1 [file s1]

## Supplementary data

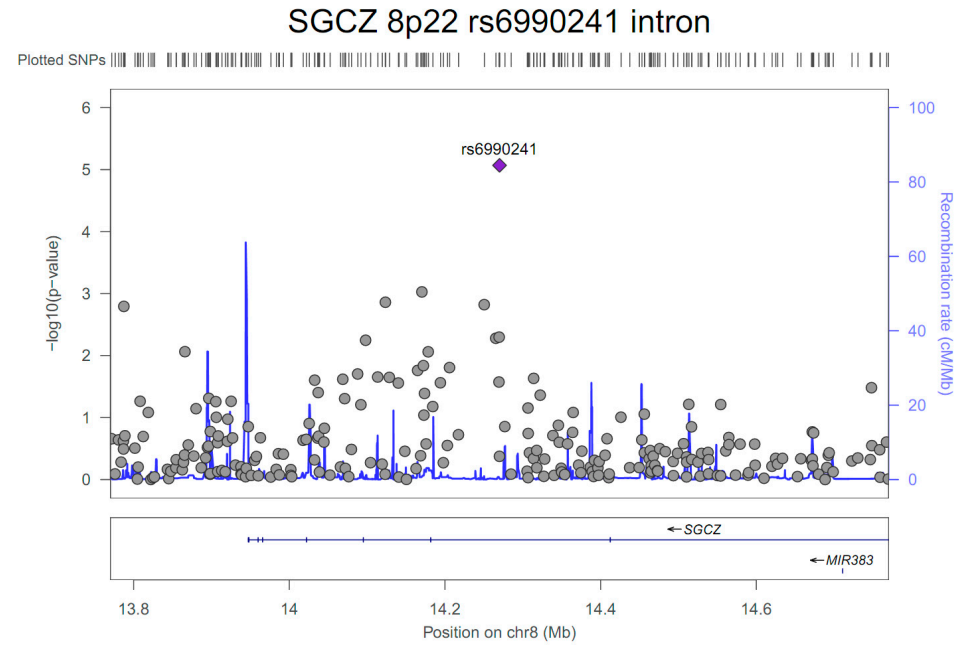

**Figure S1.** A regional plot of the rs6990241 (intron, *SGCZ*, 8p22) variant's position  $\pm 500$ kb demonstrates associations with subarachnoid hemorrhage in 250 patients with intracranial aneurysm after adjusting for age, sex, hypertension, diabetes, hyperlipidemia, cigarette smoking, and four principal components. The X- and Y-axes indicate the chromosomal position (mega base, Mb) and  $-\log_{10}$  transformed *P*-values, respectively. The purple diamond indicates the rs6990241 variant demonstrating suggestive association in our genome-wide association study ( $P = 8.5 \times 10^{-6}$ ). The gray circles indicate other SNPs within the rs6990241 variant's position  $\pm 500$ kb.

**Table S1.** Associations of 17 previously reported SNPs with intracranial aneurysms in our genome-wide association study.

| Gene              | Chr.     | SNP        | Class      | M/m <sup>a</sup> | MAF <sup>b</sup> | OR <sup>c</sup> | P <sup>c</sup> | Asian ethnicity | Reference (First author)                           |
|-------------------|----------|------------|------------|------------------|------------------|-----------------|----------------|-----------------|----------------------------------------------------|
| <i>COL3A1</i>     | 2q32.2   | rs1800255  | A698T      | G/A              | 0.23/0.27        | 0.94            | 0.670          | CHI             | Chen, Zhu                                          |
| <i>BOLL</i>       | 2q33.1   | rs700651   | intron     | A/G              | 0.48/0.45        | 1.42            | 0.008          | JPT             | Bilguvar, Hashikata, Low                           |
| <i>EDNRA</i>      | 4q31.22  | rs6841581  | Near UTR-5 | G/A              | 0.13/0.22        | 0.53            | 6.5E-04        | JPT             | Yasuno                                             |
| <i>LOX</i>        | 5q23.2   | rs1800449  | R158L      | C/T              | 0.19/0.20        | 0.97            | 0.849          | KOR             | Hong                                               |
| <i>FBN2</i>       | 5q23.3   | rs331079   | intron     | G/C              | 0.04/0.04        | 0.86            | 0.646          | JPT             | Ruigrok                                            |
| <i>ELN</i>        | 7q11.23  | rs2071307  | G422S      | G/A              | 0.13/0.14        | 0.73            | 0.117          | CHI, KOR        | Yang, Jeon                                         |
| <i>NOS3</i>       | 7q36.1   | rs1799983  | D298E      | G/T              | 0.10/0.08        | 1.18            | 0.482          | JPT,IND, KOR    | Krischek, Koshy, Kim                               |
| <i>RNU105C</i>    | 8q11.23  | rs10958409 | intergenic | G/A              | 0.22/0.24        | 1.04            | 0.781          | JPT             | Bilguvar, Hashikata, Low, Akiyama                  |
| <i>SOX17</i>      | 8q11.23  | rs9298506  | intergenic | A/G              | 0.21/0.22        | 0.98            | 0.902          | JPT             | Bilguvar, Low, Yasuno                              |
| <i>CDKN2B-AS1</i> | 9p21.3   | rs1333040  | intron     | T/C              | 0.33/0.31        | 1.05            | 0.746          | JPT             | Bilguvar, Hashikata, Low, Akiyama, Yasuno, Nakaoka |
| <i>CDKN2B-AS1</i> | 9p21.3   | rs10757272 | intron     | T/C              | 0.36/0.33        | 1.07            | 0.629          | JPT             | Low                                                |
| <i>CDKN2B-AS1</i> | 9p21.3   | rs2891168  | intron     | A/G              | 0.47/0.46        | 1.10            | 0.445          | JPT             | Nakaoka                                            |
| <i>CDKN2B-AS1</i> | 9p21.3   | rs10757278 | intergenic | A/G              | 0.49/0.47        | 1.13            | 0.328          | JPT             | Hashikata, Nakaoka                                 |
| <i>FGD6</i>       | 12q22    | rs6538595  | intron     | G/A              | 0.37/0.34        | 1.03            | 0.856          | JPT             | Yasuno                                             |
| <i>SERPINA3</i>   | 14q32.13 | rs4934     | A9T        | A/G              | 0.37/0.41        | 0.80            | 0.087          | JPT, CHI        | Krischek, Liu                                      |
| <i>MMP2</i>       | 16q12.2  | rs243865   | intron     | C/T              | 0.12/0.12        | 0.92            | 0.693          | JPT             | Low                                                |
| <i>CTAGE1</i>     | 18q11.2  | rs11661542 | intergenic | C/A              | 0.37/0.42        | 0.89            | 0.383          | JPT             | Low, Yasuno                                        |

Chr., chromosome; CHI, Chinese; IND, Indian; KOR, Korean; JPT, Japanese; OR, odds ratio; <sup>a</sup> M/m, major/minor allele type; <sup>b</sup> MAF, minor allele frequency in case (left) and control (right); <sup>c</sup> OR, 95% confidence interval, and p-value were estimated in the multivariate logistic regression model after adjustment for age, sex, hypertension, diabetes, hyperlipidemia, cigarette smoking, and four principal components.

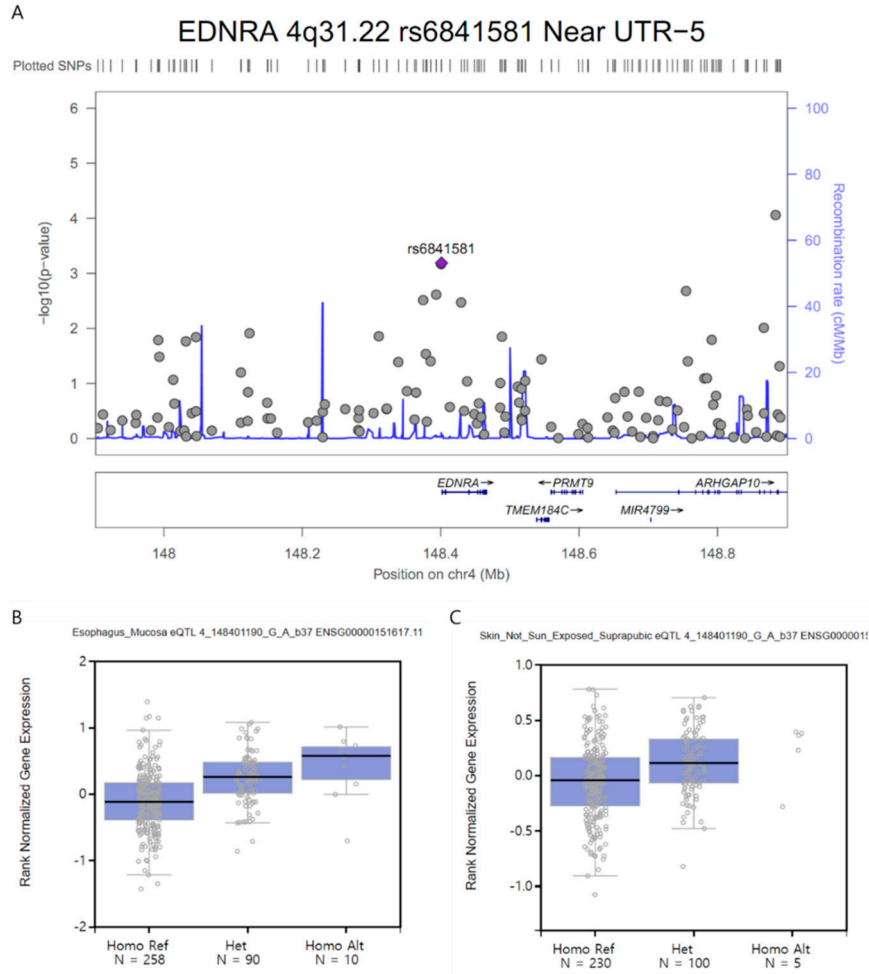

**Figure S2.** (A) A regional plot of (A) the reported SNP, rs6841581 (near UTR-5, *EDNRA*, 4q31.22) variant's position  $\pm 500$ kb demonstrating a replicated association with intracranial aneurysms in 250 patients and 294 controls after adjusting for age, sex, hypertension, diabetes, hyperlipidemia, cigarette smoking, and four principal components. The X- and Y-axes indicate the chromosomal position (mega base, Mb) and  $-\log_{10}$  transformed *P*-values, respectively. The purple diamond indicates the rs6841581 variant replicated in our genome-wide association study ( $P = 6.5 \times 10^{-4}$ ). The gray circles indicate other SNPs within the rs6841581 variant's position  $\pm 500$ kb. The expression level of the rs6841581 variant in (B) the esophagus (mucosa) ( $n = 358$ , effect size = 0.38,  $P = 5.2 \times 10^{-12}$ ) and (C) the skin not exposed to the sun (suprapubic) ( $n = 335$ , effect size = 0.21,  $P = 1.2 \times 10^{-6}$ ) tissues, respectively, were measured by analyzing the single-cell expression quantitative trait loci (eQTL) in GTex portal (<https://gtexportal.org/home>). The X- and Y-axes indicate three genotypes for each variant and the rank-normalized gene expression levels, respectively. The Reference (Ref)/Alternative (Alt) alleles of each variant's genotypes are equal to their major/minor alleles, respectively. Homo, homozygote; Het, heterozygote.

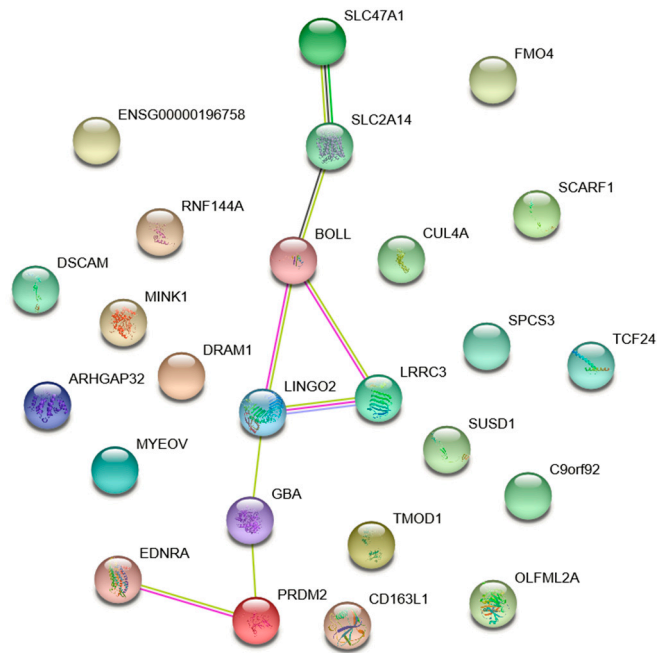

**Figure S3.** Shown here is a network of multiple protein-coding gene-gene interactions using 25 out of 31 candidate genes for susceptibility to intracranial aneurysms (six genes, *LINC01237*, *LINC00474*, *LINC02130*, *LOC102724084*, *NAPA-AS1*, and *SLC5A4-AS1*, were not available in the STRING v.10.5 database; ENSG00000196758 indicates the *FLJ45964* gene) (*Homo sapiens*). Individual's edges (lines) indicate associations between genes (i.e., genes jointly contribute to a shared function): light green lines indicate co-publication in PubMed (text mining); light purple indicates evidence of homology interacting in other species; purple lines indicate experimental evidence for interaction between genes; black lines indicate evidence of mRNA co-expression of the associated genes; and light blue indicates evidence for association from pathway database.
